# Supplementary material
Source: PubMed Central journal article supplement (PMC6018356)
Supplement: JB.00062-18_zjb999094805s1.pdf [file JB.00062-18_zjb999094805s1.pdf]

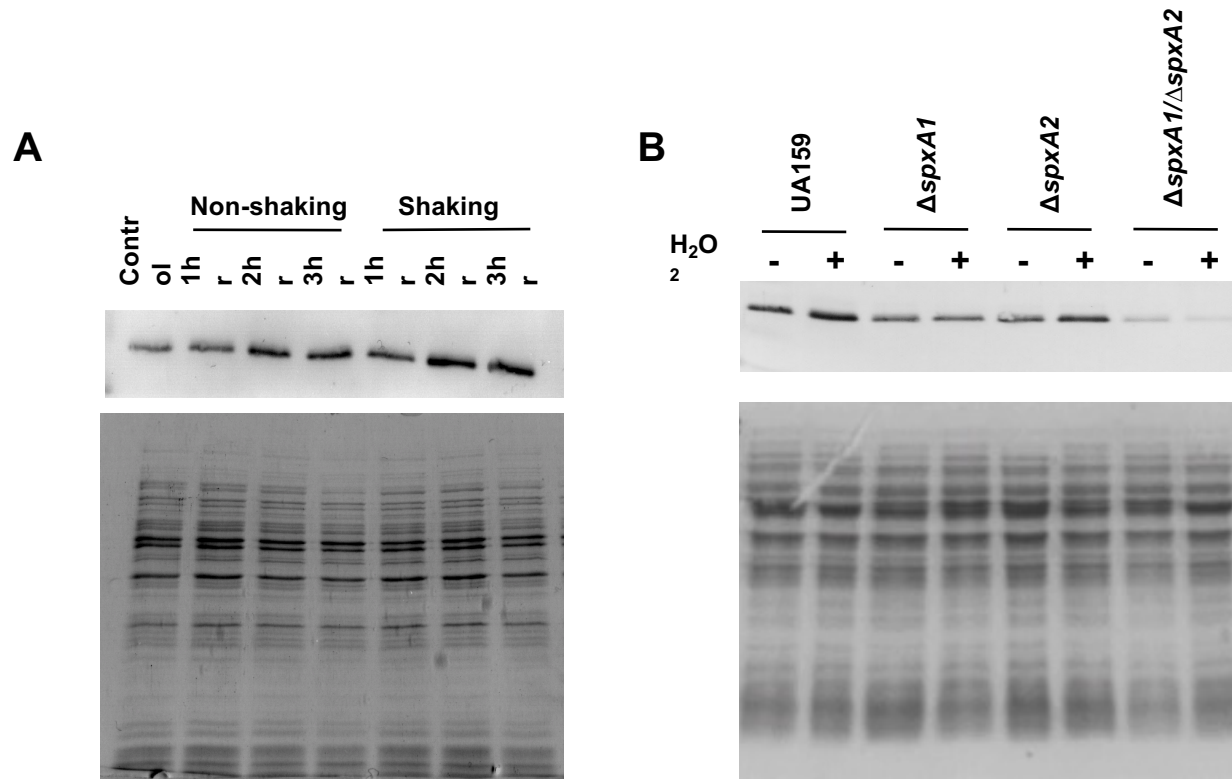

**Figure S1.** Protein loading control duplicate gels to accompany the Western blots depicted in Figure 1B and 1C. (A) Accumulation of Dpr during oxidative stress. *S. mutans* UA159 was grown statically in a 5% CO<sub>2</sub> atmosphere to mid-log phase (OD<sub>600</sub> 0.4) and split in two aliquots; one was kept in 5% CO<sub>2</sub> and the other incubated under vigorous aeration (shaking at 200 RPM). Protein lysates were prepared from samples that were removed hourly from the shaking incubator. (B) *S. mutans* UA159, ΔspxA1, ΔspxA2, or ΔspxA1/ΔspxA2 cells were grown statically in 5% CO<sub>2</sub> to OD<sub>600</sub> 0.4 and then split in two aliquots; one treated with 0.5 mM H<sub>2</sub>O<sub>2</sub> (+) and one left untreated (-) for 60 minutes. For both panels, 2 ug protein lysate per well was separated by SDS-PAGE and stained with Coomassie Brilliant Blue.

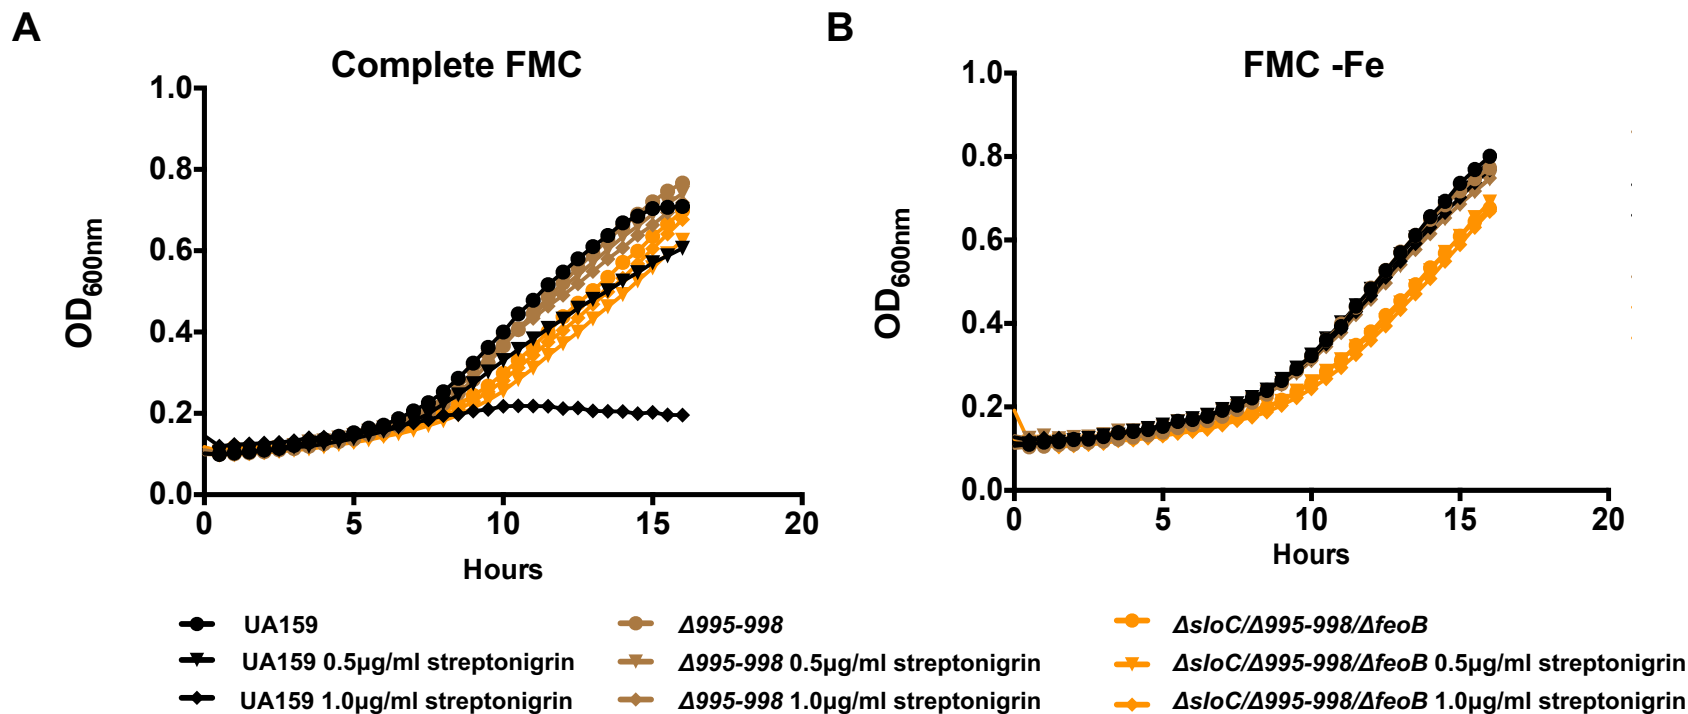

**Figure S2.** Sensitivity to streptonigrin is dependent upon availability of iron. *S. mutans* UA159, Δ995-998 or the triple mutant strain ΔsloCΔ995-998ΔfeoB were grown in the chemically defined medium FMC, complete (A) or depleted of iron (B) in the presence of 0, 0.5 µg ml<sup>-1</sup> or 1 µg ml<sup>-1</sup> of streptonigrin. Cells were grown to an OD<sub>600</sub> of 0.5 in BHI, then diluted 1:100 into the final FMC medium. Growth was monitored using a BioScreen growth reader.
